# Supplementary material for: Intra- vs. intergenerational justice tradeoffs in nuclear waste storage (W01)
Source: Copernicus journal article supplement (doi:10.5194/sand-2-27-2023), 2023-09-06
Supplement: Supplementary file 1 [file sand-2-27-2023-supplement.zip]

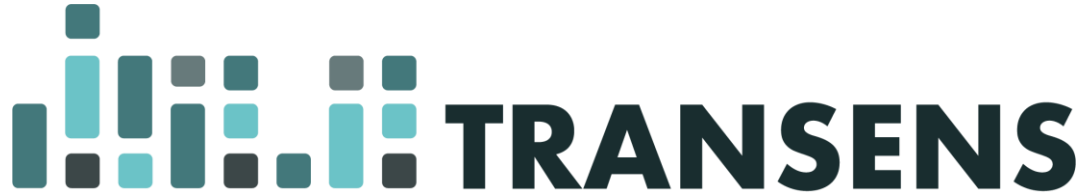

TRANSDISZIPLINÄRE FORSCHUNG ZUR ENTSORGUNG  
HOCHRADIOAKTIVER ABFÄLLE IN DEUTSCHLAND

## **Intergenerational Justice: Trade-offs in interim storage**

Rosa Sierra  
CAU-Kiel, Philosophisches Seminar

safeND, 15.09.2023

# A central distinction

## Long-term interim storage

- No plans for a final repository (e.g. underground)
- Itself a storage solution
- Several hundred years

## Necessary interim storage until storage in the final repository

- Search for a repository site, plans for a final repository
- no storage solution itself
- Several decades at best\*

\* Could several extensions of the licenses of the current interim repositories cover several centuries?

# Two justice problems – problem 1

Several extensions of the licenses would be temporally equivalent to long-term interim storage (and fully equivalent, if a final repository is not built)

- Intergenerational justice problem with long-term interim storage: the solution to the nuclear waste storage problem and the corresponding decision-making processes are passed onto the generations living in the next several centuries
  - Future generations didn't create the problem and didn't benefit from the activity that created the problem. They could have even more problems to solve than the present generations
  - (Possible counterargument: they might have better technical or financial resources to solve it)

# Two justice problems – problem 2

Several extensions of the licenses would be temporally equivalent to long-term interim storage (and fully equivalent, if a final repository is not built)

- Inter- and intragenerational justice problem: no development of a concept for an extended interim storage generates a justice problem with this and the generations in the next decades:
  - Harm: they carry the risk of waste storage on the surface, the aging of the site, and the loss of know-how; and they have no longer the benefits of the former nuclear plants they hosted.
  - Transparency: a problem of long-term interim storage arises but it's not publicly assumed and handled by authorities

# DIPRO-citizen dialogues: results clustered by topic

## Brokdorf

1. External conditions at interim sites
2. Consent or acceptance of extensions, acceptance and compensations
3. Temporally limited licenses as a promise; time frame for extensions
4. Citizen participation
5. Justice and compensation

## Lubmin / Greifswald

1. Invasive monitoring of casks („heiße Zelle“ in ESTRAL)
2. Compensation and financing
3. Problem-solving alternatives at European level
4. Extended interim storage at current sites, centralized interim storage
5. Possible paths for the storage process and transmutation

# Relevant results for our questions - Brokdorf

- Future generations
  - Compensations for an interim site should be fair: they should not only benefit the „community“ but also the „citizens“, and also take future generations into consideration.
  - Compensations should encompass several generations
- Time frame for license extension:
  1. 2047 + X years
  2. 40 – X years
  3. 40 – 600 years

# Relevant results for our questions – Lubmin

- Future generations:
  - „Compensations should encompass several generations“ → „how long should a community be compensated“ → it should be compensated while the risk/burden lasts and in a constant way
  - Education as compensation measure encompasses several generations
  - No compensation due, because of the benefits that past generations received from the reactor's operation.
- Time frame: 100 years
- Uncertainty due to long-term time frame at interim storage sites and in the process of searching and realizing a final repository
- Conflict with final storage process: it could be willingly delayed, if the new interim repository ESTRAL is built to last 300 years

# Two trade-offs

## Safety/security

Safety/security in current interim sites and change in external conditions → pressure for quickest possible availability of a final repository → risk of neglecting the primacy of safety in the final storage process, e.g. by skipping steps or not allowing setbacks

## Extension of licenses

- Several extensions of licenses at interim sites could amount to 100 years or more → no need to hurry with final storage process
- Extension of licenses only for two decades (i.e. <40 years) → contrary to the current practice of extending licenses



# Trade-offs - present and future actors

|                                                            | present<br>citizens<br>interim site | present<br>government<br>interim sites | present<br>authorities<br>who give<br>permission<br>(BASE) | future<br>citizens<br>interim site | future<br>government<br>interim sites | future<br>authorities<br>who give<br>permission | future<br>citizens final<br>repository<br>site | future<br>government<br>final repository<br>site |
|------------------------------------------------------------|-------------------------------------|----------------------------------------|------------------------------------------------------------|------------------------------------|---------------------------------------|-------------------------------------------------|------------------------------------------------|--------------------------------------------------|
| present<br>citizens<br>interim site                        |                                     |                                        |                                                            |                                    |                                       |                                                 | safety/<br>security                            |                                                  |
| present<br>government<br>interim sites                     |                                     |                                        |                                                            |                                    |                                       |                                                 |                                                |                                                  |
| present<br>authorities<br>who give<br>permission<br>(BASE) |                                     |                                        |                                                            | extension<br>licences              |                                       |                                                 |                                                |                                                  |
| future<br>citizens<br>interim site                         |                                     |                                        | extension<br>licences                                      |                                    |                                       |                                                 |                                                |                                                  |
| future<br>government<br>interim sites                      |                                     |                                        |                                                            |                                    |                                       |                                                 |                                                |                                                  |
| future<br>authorities<br>who give<br>permission            |                                     |                                        |                                                            |                                    |                                       |                                                 |                                                |                                                  |
| future<br>citizens final<br>repository<br>site             | safety/<br>security                 |                                        |                                                            |                                    |                                       |                                                 |                                                |                                                  |
| future<br>government<br>final<br>repository<br>site        |                                     |                                        |                                                            |                                    |                                       |                                                 |                                                |                                                  |

- Forthcoming:
  - **citizen dialogue in Heilbronn/Neckarwestheim (09/22-23/2023)**
  
- Some related publications by DIPRO-Kiel:
  - K. Ott/H. Budelmann, Oder vielleicht doch nicht unter der Erde – Überlegungen zur Rolle der Oberflächenlagerung in einer Entsorgungs-strategie. In: Köhnke et al (eds.), Zwischenlagerung hoch radioaktiver Abfälle Randbedingungen und Lösungsansätze zu den aktuellen Herausforderungen, 2017, pp. 11-28.
  - R. Sierra/K. Ott, Citizen participation in the long-term process of high-level radioactive waste disposal: Future tasks and adequate forms of participation. In: TATuP, 2022, 31/3: 44–50.
  - M. Berg/Th. Hassel, Challenges in communicating the future of high-level radioactive waste disposal: What future are we talking about?. In: TATuP, 2022, 31/3: 18-23.
  - K. Ott, Ad Calendas Graecas? Ethische und politische Bemerkungen zum offiziellen „Abschied von 2031“ bei der Endlagersuche. In: A. Eckhardt et al (eds.), Entscheidungen für die Zukunft: Ungewissheiten bei der Entsorgung hochradioaktiver Abfälle (forthcoming).

# Herzlichen Dank für die Aufmerksamkeit!

Gefördert durch:

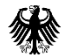

Bundesministerium  
für Umwelt, Naturschutz, nukleare Sicherheit  
und Verbraucherschutz

aufgrund eines Beschlusses  
des Deutschen Bundestages

Gefördert im  
Niedersächsischen Vorab der Volkswagenstiftung

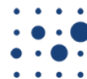

VolkswagenStiftung

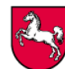

Niedersächsisches Ministerium  
für Wissenschaft und Kultur

Förderkennzeichen: 02E11849A-J
