# Supplementary material for: Intra- vs. intergenerational justice tradeoffs in nuclear waste storage (W01)
Source: Copernicus journal article supplement (doi:10.5194/sand-2-27-2023), 2023-09-06
Supplement: Supplementary file 2 [file sand-2-27-2023-supplement.zip]

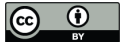

## *Supplement of*

# **Intra- vs. intergenerational justice tradeoffs in nuclear waste storage (W01)**

**Roman Seidl et al.**

*Correspondence to:* Roman Seidl (seidl@irs.uni-hannover.de)

- sand-2-27-2023-supplement-title-page.pdf
- sand-2023-10-supplement-version2.pdf
- sand-2023-10\_W01\_Trade-offs in nucl. waste manag. concerning intra- vs. intergenerational justice\_Sierra.pdf

The copyright of individual parts of the supplement might differ from the article licence.
