# Supplementary material for: Intra- vs. intergenerational justice tradeoffs in nuclear waste storage (W01)
Source: Copernicus journal article supplement (doi:10.5194/sand-2-27-2023), 2023-09-06
Supplement: Supplementary file 4 [file sand-2-27-2023-supplement.zip]

Archive with 3 entries (3 files):
- sand-2023-10-supplement-version2.pdf
- sand-2023-10_W01_Trade-offs in nucl. waste manag. concerning intra- vs. intergenerational justice_Sierra.pdf
- sand-2-27-2023-supplement-title-page.pdf
