# Supplementary figures and images for: Intra- vs. intergenerational justice tradeoffs in nuclear waste storage (W01)
Source: Copernicus journal article supplement (doi:10.5194/sand-2-27-2023), 2023-09-06

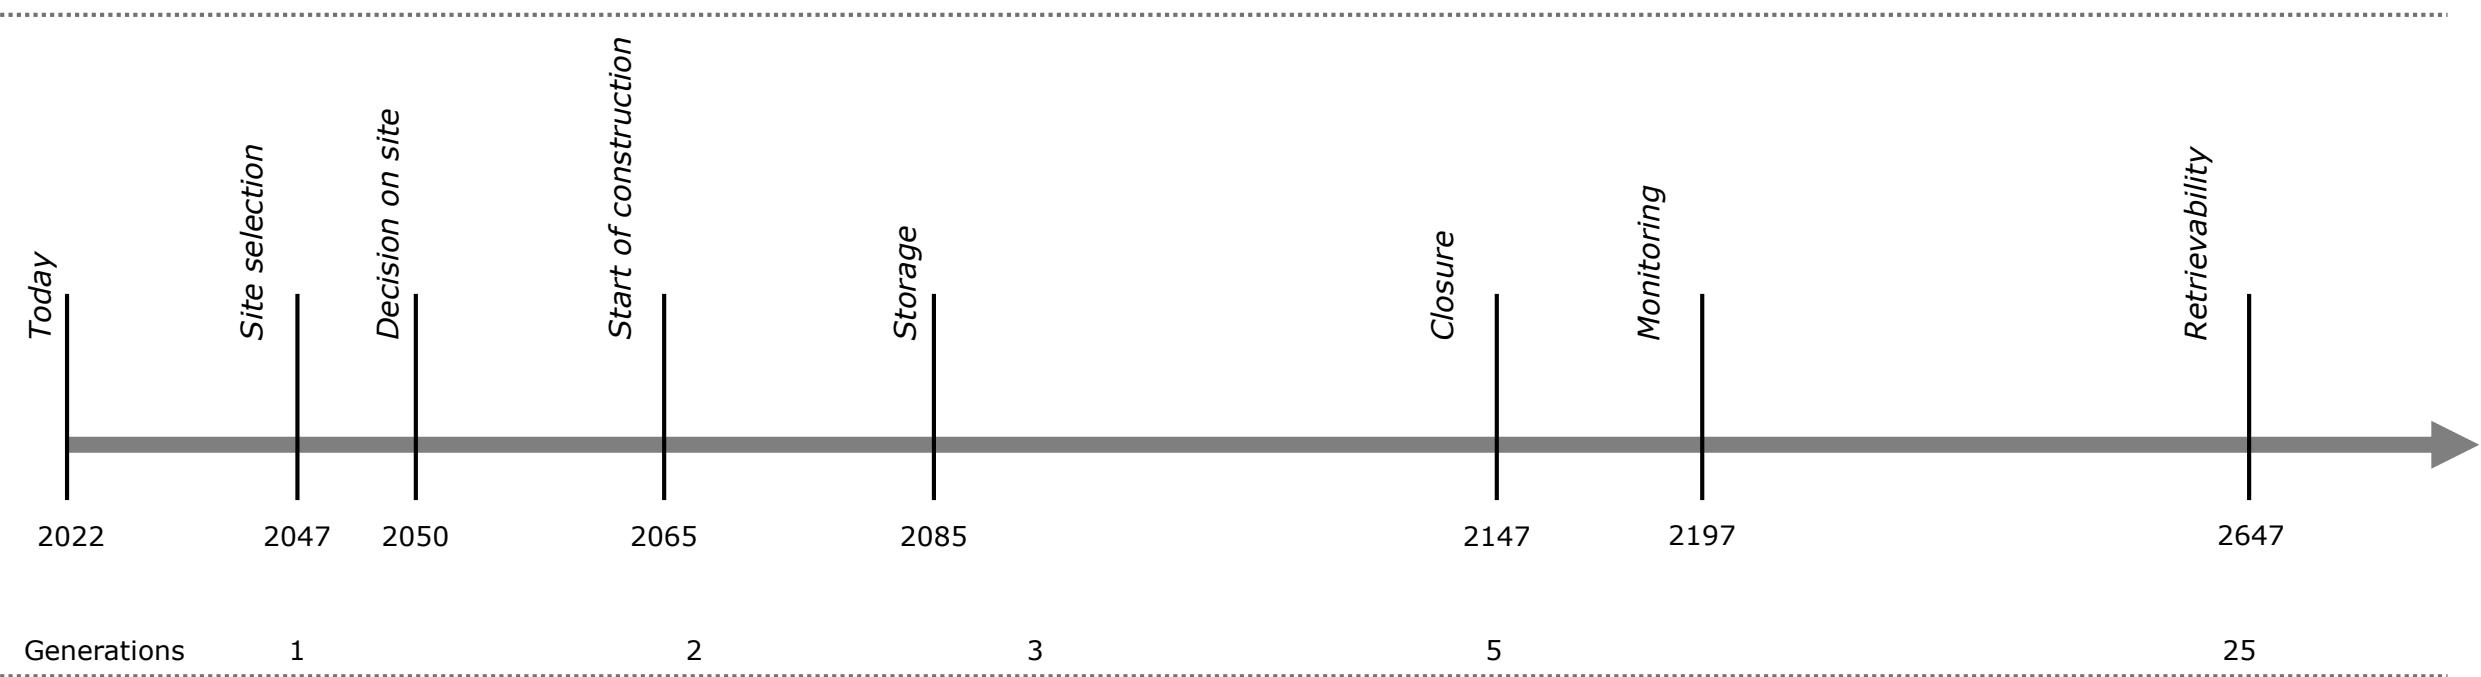

Supplement: Supplementary file 3 [file sand-2-27-2023-supplement.zip]
